# Supplementary material
Source: Elsevier journal article supplement (https://www.sciencedirect.com/science/article/pii/S1699258X22000249)
Supplement: mmc1 [file S1699258X22000249:mmc1.doc]

**ANEXO 1. PREGUNTAS EN FORMATO PICO Y ESTRATEGIAS DE BÚSQUEDA EMPLEADAS EN LAS REVISIONES SISTEMÁTICAS**

**Pregunta 1** (fue realizada en los meses previos al inicio del proyecto AR-EPIDSER, para el Documento de Recomendaciones SER-SEPAR sobre Diagnóstico y Tratamiento de la EPID asociada a la AR, que está pendiente de publicar. Se hizo una actualización de la búsqueda bibliográfica (empleando la misma estrategia de búsqueda) en septiembre de 2020, con posterioridad a la realización del Delphi, que no provocó cambios en las conclusiones de la revisión sistemática).

En pacientes con artritis reumatoide, ¿cuáles son los factores de riesgo de relevancia para la aparición de enfermedad pulmonar intersticial difusa (EPID)?

*Población:* pacientes mayores de 18 años, con diagnóstico de AR según los criterios ACR de 1987 o criterios EULAR/ACR 2010, con o sin enfermedad pulmonar intersticial difusa (EPID) previa. Para algunos estudios se ha permitido el diagnostico mediante código ICD (*International Classification of Disease*) versión 9 o 10 dado que muchas cohortes de gran tamaño incluidas en estudios de calidad utilizan estos criterios.

*Intervención:* Se buscaron estudios donde se investigarán factores de riesgo para desarrollar enfermedad pulmonar intersticial.

Factores epidemiológicos: edad, sexo, raza, duración de la enfermedad, criterios de gravedad, manifestaciones extraarticulares, inicio tardío de la AR, duración de la enfermedad, hábito tabáquico, u otros tóxicos incluyendo exposición ambiental.

Fármacos empleados en el tratamiento de AR

- FAME sintéticos convencionales: metotrexato (MTX), leflunomida (LEF), u otros
- FAME sintéticos dirigidos: tofacitinib, baricitinib, upadacitinib, filgotinib
- FAME biológicos: anti-TNF (infliximab, etanercept, adalimumab, certolizumab, golimumab), rituximab, abatacept, tocilizumab, sarilumab, anakinra.

Biomarcadores

- Anticuerpos antiproteínas citrulinadas (ACPA), (o anticuerpos antipéptidos cíclicos citrulinados)
- Factor reumatoide (FR)
- Niveles séricos de Krebs von den Lungen-6 [KL-6] y de interleucina (IL)-6
- Otros: Metaloproteasa (MMP) 7 (o matrilisin), proteína surfactante, Interferon inducible proteina 10 (IP-10) /CXCL10, YKL-40 (chitinase-3-like protein 1 [CHI3L1], Chemokine (C-C motif) ligand 18 (CCL18)

Factores genéticos y epigenéticos (alelos HLA-DR, epítopo compartido, MUC5B, acortamiento telomérico, miRNA)

*Comparación:* un factor de riesgo frente a otro o sin comparación.

*Resultado:* aparición de EPID (diagnostico por TAC y/o biopsia) o criterios clínicos. Desde el año 2002 el gold estándar de diagnóstico de EPID es multidisciplinar clínico-radiológico-histológico, siendo los patrones radiológicos del TAC una pieza fundamental.

PUBMED 16/12/2019

683 resultados

("Arthritis, Rheumatoid"[Mesh:NoExp] OR "rheumatoid arthriti*"[Title/Abstract] OR "arthritis rheumat*"[Title/Abstract] OR "rheumatic arthritis"[Title/Abstract] OR RA[Title/Abstract] OR "Caplan Syndrome"[Mesh] OR "Caplan* Syndrome*"[Title/Abstract])

AND

("Lung Diseases, Interstitial"[Mesh] OR "Interstitial Lung"[Title/Abstract] OR “Lung Disease Interstitial"[Title/Abstract] OR ILD[Title/Abstract] OR “RA-ILD”[Title/Abstract] OR “Fibrotic lung disease*”[Title/Abstract] OR “chronic connective tissue disease”[Title/Abstract] OR CTD[Title/Abstract] OR “Chronic Lung Disease*”[Title/Abstract] OR “Chronic Inflammatory Lung Disease*”[Title/Abstract] OR “Interstitial pneumonia”[Title/Abstract] OR “Interstitial pneumonitis”[Title/Abstract] OR UIP[Title/Abstract] OR "Pneumonia"[Mesh:NoExp] OR Pneumoni*[Title/Abstract] OR “idiopathic interstitial pneumoni*”[Title/Abstract] OR IIP[Title/Abstract] OR NSIP[Title/Abstract] OR "Cryptogenic Organizing Pneumonia"[Mesh] OR "Cryptogenic Organizing Pneumoni*"[Title/Abstract] OR COP[Title/Abstract] OR “cryptogenic fibrosing alveolitis”[Title/Abstract] OR CFA[Title/Abstract] OR “Organizing Pneumoni*”[Title/Abstract]

OR “Bronchiolitis obliterans Organizing Pneumoni*”[Title/Abstract] OR BOOP[Title/Abstract] OR "Idiopathic Pulmonary Fibrosis"[Mesh] OR “idiopathic pulmonary fibros*”[Title/Abstract] OR "Pulmonary Fibrosis"[Mesh] OR "Pulmonary Fibrosi*"[Title/Abstract] OR IPF[Title/Abstract]

OR (interstiti*[Title/Abstract] AND (pneumoni*[Title/Abstract] OR lung*[Title/Abstract] OR pulmonary[Title/Abstract] OR alveoli*[Title/Abstract])) OR "emphysema"[Title/Abstract] OR CPFE[Title/Abstract] OR honey- combing[Title/Abstract] OR honeycombing[Title/Abstract] OR "Diffuse alveolar damag*"[Title/Abstract] OR DAD[Title/Abstract] OR "Ground* glass* opacit*"[Title/Abstract] OR GGO[Title/Abstract] OR “Thoracic Manifestation*”[Title/Abstract])

AND

(risk[Title/Abstract] OR risk[MeSH:noexp] OR mortality[Title/Abstract] OR mortality[MeSH:noexp] OR cohort[Title/Abstract])

NOT ("Clinical Conference"[Publication Type] OR "Congress"[Publication Type] OR "Consensus Development Conference"[Publication Type] OR "Published Erratum"[Publication Type] OR "Comment"[Publication Type] OR mice[Title/Abstract] OR mouse[Title/Abstract])

NOT ("Animals"[Mesh] NOT ("Animals"[Mesh] AND "Humans"[Mesh]))

 Filters: **English, French, Spanish**

Embase 16/12/2019

344 resultados

('rheumatoid arthritis'/de OR 'rheumatoid arthritis':ab,ti OR 'arthritis rheumatoid'/de OR 'arthritis rheumatoid':ab,ti OR 'rheumatic arthritis'/de OR 'rheumatic arthritis':ab,ti OR RA:ab,ti OR "Caplan Syndrome":ab,ti)

AND

('interstitial lung disease'/exp OR 'interstitial lung':ab,ti OR 'Lung Diseases Interstitial':ab,ti OR 'ild':ab,ti OR 'ra-ild':ab,ti OR “chronic connective tissue disease*”:ab,ti OR “CTD”:ab,ti OR “fibrotic connective tissue disease*”:ab,ti OR “Chronic Lung Disease”:ab,ti OR “Chronic Inflammatory Lung Disease”:ab,ti

OR 'interstitial pneumonia'/exp OR 'interstitial pneumonia*':ab,ti OR 'interstitial pneumonitis':ab,ti OR 'uip':ab,ti OR 'ip':ab,ti OR

“NSIP”:ab,ti OR 'bronchiolitis obliterans organizing pneumonia'/exp OR "Cryptogenic Organizing Pneumonia":ab,ti OR “COP”:ab,ti OR “Organizing Pneumonia”:ab,ti OR “Bronchiolitis obliterans Organizing Pneumonia”:ab,ti OR “BOOP”:ab,ti OR “cryptogenic fibrosing alveolitis”:ab,ti OR CFA:ab,ti

OR 'fibrosing alveolitis'/exp OR 'fibrosing alveolitis':ab,ti OR 'idiopathic pulmonary fibrosis':ab,ti OR 'ipf':ab,ti OR "Pulmonary Fibrosis":ab,ti OR 'lung fibrosis'/exp

OR 'pneumonia'/de OR Pneumoni*:ab,it OR “idiopathic interstitial pneumoni*”:ab,ti OR IIP:ab,ti OR

(interstiti*:ab,ti AND (pneumoni*:ab,ti OR lung:ab,ti OR pulmonary:ab,ti OR alveoli*:ab,ti)) OR "emphysema":ab,ti OR "CPFE":ab,ti OR 'honeycombing'/exp OR honeycombing:ab,ti OR “honey- combing”:ab,ti OR "Diffuse alveolar damag*":ab,ti OR DAD:ab,ti OR "Ground* glass* opacit*":ab,ti OR GGO:ab,ti OR “Thoracic Manifestation*”:ab,ti)

AND

(risk OR mortalit* OR cohort)

AND ([embase]/lim NOT [medline]/lim) AND ([english]/lim OR [french]/lim OR [spanish]/lim) NOT ('animals'/exp NOT ('animals'/exp AND 'humans'/exp)) NOT ([conference abstract]/lim OR [conference paper]/lim OR [conference review]/lim OR [erratum]/lim OR [note]/lim OR [short survey]/lim)

Cochrane Library 16/12/2019

108 resultados

ID Search Hits

#1 MeSH descriptor: [Arthritis, Rheumatoid] this term only 5793

#2 MeSH descriptor: [Caplan Syndrome] explode all trees 0

#3 ("rheumatoid arthritis" OR "arthritis rheumatoid" OR "arthritis rheumatic" OR "rheumatic arthritis" OR "Caplan Syndrome"):ti,ab,kw 15357

#4 #1 OR #2 OR #3 15357

#5 MeSH descriptor: [Lung Diseases, Interstitial] explode all trees 754

#6 ("Interstitial Lung" OR "Lung Disease Interstitial" OR ILD OR RA-ILD OR “Fibrosis lung disease” OR “chronic connective tissue disease” OR CTD OR “Chronic Lung Disease” OR “Chronic Inflammatory Lung Disease*” OR “Interstitial pneumonia” OR “Interstitial pneumonitis” OR UIP):ti,ab,kw 3030

#7 (Pneumoni* OR “idiopathic interstitial pneumonia” OR IIP OR NSIP OR "Cryptogenic Organizing Pneumonia" OR COP OR “cryptogenic fibrosing alveolitis” OR CFA OR “Organizing Pneumonia” OR “Bronchiolitis obliterans Organizing Pneumonia” OR BOOP OR “idiopathic pulmonary fibrosis” OR "Pulmonary Fibrosis" OR IPF):ab,ti,kw 20093

#8 MeSH descriptor: [Pneumonia] this term only 2177

#9 MeSH descriptor: [Cryptogenic Organizing Pneumonia] 3 tree(s) exploded 4

#10 MeSH descriptor: [Idiopathic Pulmonary Fibrosis] explode all trees 311

#11 MeSH descriptor: [Pulmonary Fibrosis] explode all trees 532

#12 (interstiti* NEXT/5 (pneumoni* OR lung OR pulmonary OR alveoli*)):ab,ti,kw 1629

#13 ("emphysema" OR CPFE OR "honey- combing" OR honeycombing OR "Diffuse alveolar damage" OR DAD OR "Ground glass opacity" OR GGO OR “Thoracic Manifestation”):ab,ti,kw 1912

#14 #5 OR #6 OR #7 OR #8 OR #9 OR #10 OR #11 OR #12 OR #13 24235

#15 #4 AND #14 360

#16 risk:ti,ab OR mortality:ti,ab OR cohort:ti,ab 265477

#17 MeSH descriptor: [Risk] this term only 3263

#18 MeSH descriptor: [Mortality] this term only 542

#19 #16 OR #17 OR #18 266094

Se identificaron un total de 1135 artículos de los cuales 89 fueron seleccionados para una revisión en detalle tras la exclusión de referencias por título (835) y resumen (151). Un total de 58 artículos fueron incluidos y 32 fueron excluidos al no cumplir los criterios de inclusión.

**Pregunta 2**

¿Qué herramientas de cribado de enfermedad pulmonar intersticial en pacientes con artritis reumatoide existen?

Población: sujetos adultos (≥18 años) con AR

Intervención: herramientas de cribado de enfermedad pulmonar intersticial

Comparación: cualquier comparador o sin grupo de comparación

Resultado: de validez, de fiabilidad y estudios de descripción de las herramientas de cribado, aunque no aporten resultados de validez o fiabilidad.

PUBMED 16/04/2020

497 resultados

("Arthritis, Rheumatoid"[Mesh:NoExp] OR "rheumatoid arthriti*"[Title/Abstract] OR "arthritis rheumat*"[Title/Abstract] OR "rheumatic arthritis"[Title/Abstract] OR RA[Title/Abstract] OR "Caplan Syndrome"[Mesh] OR "Caplan* Syndrome*"[Title/Abstract] OR “early arthritis”[Title/Abstract] OR “early rheumatoid arthritis”[Title/Abstract] OR “early RA”[Title/Abstract] OR “Inflammatory Arthritis” [Title/Abstract] OR "Rheumatology"[Mesh] OR "Rheumatology"[Title/Abstract] OR "Rheumatologists"[Mesh] OR "Rheumatologists"[Title/Abstract])

AND

("Lung Diseases, Interstitial"[Mesh] OR "Interstitial Lung*"[Title/Abstract] OR “Lung Disease Interstitial"[Title/Abstract] OR ILD[Title/Abstract] OR “RA-ILD”[Title/Abstract] OR “Fibro* lung disease*”[Title/Abstract] OR “chronic connective tissue disease*”[Title/Abstract] OR CTD[Title/Abstract] OR “Chronic Lung Disease*”[Title/Abstract] OR “Chronic Inflammatory Lung Disease*”[Title/Abstract] OR “Interstitial pneumoni*”[Title/Abstract] OR “Interstitial pneumonitis”[Title/Abstract] OR UIP[Title/Abstract] OR "Pneumonia"[Mesh:NoExp] OR Pneumoni*[Title/Abstract] OR “idiopathic interstitial pneumoni*”[Title/Abstract] OR IIP[Title/Abstract] OR NSIP[Title/Abstract] OR "Cryptogenic Organizing Pneumonia"[Mesh] OR "Cryptogenic Organizing Pneumoni*"[Title/Abstract] OR COP[Title/Abstract] OR “cryptogenic fibrosing alveolitis”[Title/Abstract] OR CFA[Title/Abstract] OR “Organizing Pneumoni*”[Title/Abstract] OR “Bronchiolitis obliterans Organizing Pneumoni*”[Title/Abstract] OR BOOP[Title/Abstract] OR "Idiopathic Pulmonary Fibrosis"[Mesh] OR “idiopathic pulmonary fibros*”[Title/Abstract] OR "Pulmonary Fibrosis"[Mesh] OR "Pulmonary Fibrosi*"[Title/Abstract] OR IPF[Title/Abstract] OR (interstiti*[Title/Abstract] AND (pneumoni*[Title/Abstract] OR lung*[Title/Abstract] OR pulmonary[Title/Abstract] OR alveoli*[Title/Abstract])) OR "emphysema"[Title/Abstract] OR CPFE[Title/Abstract] OR honey- combing[Title/Abstract] OR honeycombing[Title/Abstract] OR "Diffuse alveolar damag*"[Title/Abstract] OR DAD[Title/Abstract] OR "Ground* glass* opacit*"[Title/Abstract] OR GGO[Title/Abstract] OR “Thoracic Manifestation*”[Title/Abstract])

AND

("Referral and Consultation"[Mesh] OR referr*[Title/Abstract] OR "Patient Selection"[Mesh] OR "Patient Selection"[Title/Abstract] OR “clinical aspect”[Title/Abstract] OR “clinical feature”[Title/Abstract] OR “clinical features”[Title/Abstract] OR “clinical characteristic*”[Title/Abstract] OR “screening criteria”[Title/Abstract] OR "Mass Screening"[Mesh:NoExp] OR “screening”[Title/Abstract] OR "Early Diagnosis"[Mesh:NoExp] OR "early diagnosis"[Title/Abstract] OR “early detection”[Title/Abstract] OR “diagnostic test”[Title/Abstract] OR “test diagnostic”[Title/Abstract] OR ”diagnostic tool*”[Title/Abstract] OR “multidisciplinar*”[Title/Abstract])

NOT ("Clinical Conference"[Publication Type] OR "Congress"[Publication Type] OR "Consensus Development Conference"[Publication Type] OR "Published Erratum"[Publication Type] OR "Comment"[Publication Type] OR mice[Title/Abstract] OR mouse[Title/Abstract])

NOT ("Animals"[Mesh] NOT ("Animals"[Mesh] AND "Humans"[Mesh]))

Filters: Spanish; French; English

Embase 16/04/2020

292 resultados

('rheumatoid arthritis'/de OR 'rheumatoid arthritis':ab,ti OR 'arthritis rheumatoid'/de OR 'arthritis rheumatoid':ab,ti OR 'rheumatic arthritis'/de OR 'rheumatic arthritis':ab,ti OR RA:ab,ti OR "Caplan Syndrome":ab,ti OR 'early arthritis'/exp OR 'early arthritis':ti,ab OR 'early rheumatoid arthritis':ti,ab OR 'early ra':ti,ab OR 'inflammatory arthritis':ti,ab OR 'rheumatology'/exp OR 'rheumatology':ab,ti OR 'rheumatologist':ab,ti OR 'rheumatologist'/exp)

AND

('interstitial lung disease'/exp OR 'interstitial lung':ab,ti OR 'Lung Diseases Interstitial':ab,ti OR 'ild':ab,ti OR 'ra-ild':ab,ti OR “chronic connective tissue disease*”:ab,ti OR “CTD”:ab,ti OR “fibrotic connective tissue disease*”:ab,ti OR “Chronic Lung Disease”:ab,ti OR “Chronic Inflammatory Lung Disease”:ab,ti

OR 'interstitial pneumonia'/exp OR 'interstitial pneumonia*':ab,ti OR 'interstitial pneumonitis':ab,ti OR 'uip':ab,ti OR 'ip':ab,ti OR

“NSIP”:ab,ti OR 'bronchiolitis obliterans organizing pneumonia'/exp OR "Cryptogenic Organizing Pneumonia":ab,ti OR “COP”:ab,ti OR “Organizing Pneumonia”:ab,ti OR “Bronchiolitis obliterans Organizing Pneumonia”:ab,ti OR “BOOP”:ab,ti OR “cryptogenic fibrosing alveolitis”:ab,ti OR CFA:ab,ti

OR 'fibrosing alveolitis'/exp OR 'fibrosing alveolitis':ab,ti OR 'idiopathic pulmonary fibrosis':ab,ti OR 'ipf':ab,ti OR "Pulmonary Fibrosis":ab,ti OR 'lung fibrosis'/exp

OR 'pneumonia'/de OR Pneumoni*:ab,it OR “idiopathic interstitial pneumoni*”:ab,ti OR IIP:ab,ti OR

(interstiti*:ab,ti AND (pneumoni*:ab,ti OR lung:ab,ti OR pulmonary:ab,ti OR alveoli*:ab,ti)) OR "emphysema":ab,ti OR "CPFE":ab,ti OR 'honeycombing'/exp OR honeycombing:ab,ti OR “honey- combing”:ab,ti OR "Diffuse alveolar damag*":ab,ti OR DAD:ab,ti OR "Ground* glass* opacit*":ab,ti OR GGO:ab,ti OR “Thoracic Manifestation*”:ab,ti)

AND

('patient referral'/exp OR referr*:ab,ti OR  'patient referral':ab,ti OR 'referral':ab,ti OR 'referral and consultation':ab,ti “Referral criteria”:ab,ti OR 'patient selection'/exp OR 'patient selection':ab,ti OR 'clinical feature'/exp OR 'clinical aspect':ab,ti OR 'clinical feature':ab,ti OR 'clinical features':ab,ti OR 'clinical characteristics':ab,ti OR “screening criteria”:ab,ti OR 'screening'/de OR “screenning”:ab,ti OR 'early diagnosis'/de OR 'diagnosis, early':ab,ti OR 'early diagnosis':ab,ti OR 'Early detection':ab,ti OR 'diagnostic test'/de OR 'diagnostic test':ab,ti OR 'test diagnostic':ab,ti OR 'diagnostic tool':ab,ti OR 'diagnostic tools':ab,ti OR 'multidisciplinary team'/exp OR 'multi-disciplinary team':ab,ti OR 'multidisciplinary team':ab,ti OR 'multidisciplinary approach'/exp OR 'multidisciplinary management'/exp OR multidisciplinary:ab,ti OR multi-disciplinary:ab,ti)

AND ([embase]/lim NOT [medline]/lim) AND ([english]/lim OR [french]/lim OR [spanish]/lim) NOT ('animals'/exp NOT ('animals'/exp AND 'humans'/exp)) NOT ([conference abstract]/lim OR [conference paper]/lim OR [conference review]/lim OR [erratum]/lim OR [note]/lim OR [short survey]/lim)

Cochrane Library 16/04/2020

60 resultados

ID Search Hits

#1 MeSH descriptor: [Arthritis, Rheumatoid] this term only 5703

#2 MeSH descriptor: [Rheumatology] explode all trees 87

#3 MeSH descriptor: [Rheumatologists] explode all trees 7

#4 ("rheumatoid arthritis" OR "arthritis rheumatoid" OR "arthritis rheumatic" OR "rheumatic arthritis" OR RA OR "Caplan Syndrome"):ti,ab,kw 18276

#5 (“early arthritis” OR “early rheumatoid arthritis” OR “early RA” OR “Inflammatory Arthritis” OR "Rheumatology" OR "Rheumatologists"):ab,ti,kw 7952

#6 #1 OR #2 OR #4 OR #5 21911

#7 MeSH descriptor: [Lung Diseases, Interstitial] explode all trees 784

#8 ("Interstitial Lung" OR "Lung Disease Interstitial" OR ILD OR RA-ILD OR “Fibrosis lung disease” OR “chronic connective tissue disease” OR CTD OR “Chronic Lung Disease” OR “Chronic Inflammatory Lung Disease*” OR “Interstitial pneumonia” OR “Interstitial pneumonitis” OR UIP):ti,ab,kw 2926

#9 (Pneumoni* OR “idiopathic interstitial pneumonia” OR IIP OR NSIP OR "Cryptogenic Organizing Pneumonia" OR COP OR “cryptogenic fibrosing alveolitis” OR CFA OR “Organizing Pneumonia” OR “Bronchiolitis obliterans Organizing Pneumonia” OR BOOP OR “idiopathic pulmonary fibrosis” OR "Pulmonary Fibrosis" OR IPF):ab,ti,kw 19190

#10 MeSH descriptor: [Pneumonia] this term only 1999

#11 MeSH descriptor: [Cryptogenic Organizing Pneumonia] 3 tree(s) exploded 4

#12 MeSH descriptor: [Idiopathic Pulmonary Fibrosis] explode all trees 280

#13 MeSH descriptor: [Pulmonary Fibrosis] explode all trees 498

#14 (interstiti* NEXT/5 (pneumoni* OR lung OR pulmonary OR alveoli*)):ab,ti,kw 1561

#15 ("emphysema" OR CPFE OR "honey- combing" OR honeycombing OR "Diffuse alveolar damage" OR DAD OR "Ground glass opacity" OR GGO OR “Thoracic Manifestation”):ab,ti,kw 1856

#16 #7 OR #8 OR #9 OR #10 OR #11 OR #12 OR #13 OR #14 OR #15 23228

#17 #6 AND #16 506

#18 MeSH descriptor: [Referral and Consultation] explode all trees 2208

#19 MeSH descriptor: [Patient Selection] explode all trees 3410

#20 (referr* OR "Patient Selection" OR 'clinical aspect' OR "clinical feature" OR "clinical features" OR "clinical characteristics" OR “screening criteria” OR “screening” OR "early diagnosis" OR “early detection” OR multidisciplinary):ab,ti,kw 103513

#21 MeSH descriptor: [Mass Screening] this term only 2993

#22 MeSH descriptor: [Early Diagnosis] this term only 491

#23 #18 OR #19 OR #20 OR #21 OR #22 103842

#24 #17 AND #23 60

Con la estrategia de búsqueda se recuperaron 849 estudios, de los cuales 35 estaban duplicados. Tras hacer una revisión por título y abstract, se descartaron 757, quedando 57 para revisión en profundidad. Tras la revisión de los artículos completos, 19 se incluyeron en la revisión. Además, se incluyeron 6 artículos encontrados por búsqueda manual en las referencias de los artículos incluidos, haciendo un total de 25 artículos.

**Pregunta 3**

¿Qué criterios de derivación por artritis inflamatoria temprana / artritis reumatoide temprana a Reumatología existen?

Población: sujetos adultos (≥18 años) con clínica articular.

Intervención: criterios de derivación a Reumatología por artritis inflamatoria temprana / artritis reumatoide temprana.

Comparación: cualquier comparador o sin grupo de comparación.

Resultado: de validez, de fiabilidad y estudios de descripción de los criterios de derivación, aunque no aporten resultados de validez o fiabilidad.

PUBMED 16/4/2020

932 Resultados

((“early arthritis”[Title/Abstract] OR “early rheumatoid arthritis”[Title/Abstract] OR “early RA”[Title/Abstract] OR “Inflammatory Arthritis”[Title/Abstract])

AND

("Referral and Consultation"[Mesh] OR referr*[Title/Abstract] OR "Patient Selection"[Mesh] OR "Patient Selection"[Title/Abstract] OR 'clinical aspect'[Title/Abstract] OR 'clinical feature'[Title/Abstract] OR 'clinical features'[Title/Abstract] OR 'clinical characteristics'[Title/Abstract] OR “screening criteria”[Title/Abstract] OR "Mass Screening"[Mesh:NoExp] OR “screening”[Title/Abstract] OR "Early Diagnosis"[Mesh:NoExp] OR "early diagnosis"[Title/Abstract] OR “early detection”[Title/Abstract] OR “multidisciplinary”[Title/Abstract]))

NOT (“psoriatic arthritis”[Title] OR “psoriasis”[Title])

NOT ("Tuberculosis"[Mesh] OR "Tuberculosis"[Title/Abstract])

NOT ("Clinical Conference"[Publication Type] OR "Congress"[Publication Type] OR "Consensus Development Conference"[Publication Type] OR "Published Erratum"[Publication Type] OR "Comment"[Publication Type] OR mice[Title/Abstract] OR mouse[Title/Abstract])

NOT ("Animals"[Mesh] NOT ("Animals"[Mesh] AND "Humans"[Mesh]))

Filters: Spanish; French; English

Embase 16/4/2020

138 resultados

(('early arthritis'/exp OR 'early arthritis':ti,ab OR 'early rheumatoid arthritis':ti,ab OR 'early ra':ti,ab OR 'inflammatory arthritis':ti,ab)

AND

('patient referral'/exp OR referr*:ab,ti OR  'patient referral':ab,ti OR 'referral':ab,ti OR 'referral and consultation':ab,ti “Referral criteria”:ab,ti OR 'patient selection'/exp OR 'patient selection':ab,ti OR 'clinical feature'/exp OR 'clinical aspect':ab,ti OR 'clinical feature':ab,ti OR 'clinical features':ab,ti OR 'clinical characteristics':ab,ti OR “screening criteria”:ab,ti OR 'screening'/de OR “screenning”:ab,ti OR 'early diagnosis'/de OR 'diagnosis, early':ab,ti OR 'early diagnosis':ab,ti OR “Early detection”:ab,ti OR 'multidisciplinary team'/exp OR 'multi-disciplinary team':ab,ti OR 'multidisciplinary team':ab,ti OR 'multidisciplinary approach'/exp OR 'multidisciplinary management'/exp OR multidisciplinary:ab,ti OR multi-disciplinary:ab,ti))

NOT (“psoriatic arthritis”:ti OR “psoriasis”:ti)

NOT ('tuberculosis'/exp OR "Tuberculosis":ti,ab)

AND ([embase]/lim NOT [medline]/lim) AND ([english]/lim OR [french]/lim OR [spanish]/lim) NOT ('animals'/exp NOT ('animals'/exp AND 'humans'/exp)) NOT ([conference abstract]/lim OR [conference paper]/lim OR [conference review]/lim OR [erratum]/lim OR [note]/lim OR [short survey]/lim)

Cochrane Library 16/4/2020

165 resultados

Search Name:

Date Run: 16/04/2020 01:10:49

Comment: 2020

ID Search Hits

#1 (“early arthritis” OR “early rheumatoid arthritis” OR “early RA” OR “Inflammatory Arthritis”):ab,ti,kw 1609

#2 MeSH descriptor: [Referral and Consultation] explode all trees 2208

#3 MeSH descriptor: [Patient Selection] explode all trees 3410

#4 (referr* OR "Patient Selection" OR 'clinical aspect' OR "clinical feature" OR "clinical features" OR "clinical characteristics" OR “screening criteria” OR “screening” OR "early diagnosis" OR “early detection” OR multidisciplinary):ab,ti,kw 103512

#5 MeSH descriptor: [Mass Screening] this term only 2993

#6 MeSH descriptor: [Early Diagnosis] this term only 491

#7 #2 OR #3 OR #4 OR #5 OR #6 103841

#8 #1 AND #7 178

#9 (“psoriatic arthritis” OR “psoriasis”):ti 6751

#10 MeSH descriptor: [Tuberculosis] explode all trees 586

#11 Tuberculosis:ti,ab,kw 6187

#12 #9 OR #10 OR #11 12798

#13 #8 NOT #12 165

Con la estrategia de búsqueda se recuperaron 1235 referencias, de las cuales 105 estaban duplicadas. Tras hacer una revisión por título y abstract, se descartaron 970, quedando 60 para revisión en profundidad. Tras la revisión de los artículos completos, 13 se incluyeron en la revisión. Además, se incluyó 1 artículo encontrado por búsqueda manual en las referencias de los artículos incluidos, haciendo un total de 14 artículos.
