# Supplementary material
Source: Elsevier journal article supplement (https://www.sciencedirect.com/science/article/pii/S1699258X22000249)
Supplement: mmc2 [file S1699258X22000249:mmc2.doc]

**ANEXO 2. RESULTADOS DEL DELPHI**

**Criterios de cribado de EPID en pacientes diagnosticados de AR**

*Resultados de la primera ronda Delphi*

Se recogieron las valoraciones de los 14 miembros del panel. La tabla 1 muestra el grado de acuerdo (porcentaje de panelistas que valoraron con puntuación 4 o 5) alcanzado para cada ítem propuesto por el Comité Científico.

**Tabla 1. Criterios para el/la cribado/detección precoz de EPID en pacientes con AR. Resultados de la primera ronda del Delphi1.**

|  | **Grado de acuerdo** |
| --- | --- |
| ***¿A quién hacer pruebas de cribado/detección precoz?*** | |
| Pacientes con clínica respiratoria: tos y/o disnea de más de 3 meses de evolución | 100% |
| Pacientes en los que se detecten crepitantes tipo velcro en la auscultación respiratoria (aunque estén asintomáticos). | 100% |
| Edad ≥55 años:  1 punto | 50%  71.4% |
| Edad ≥60 años:  2 puntos | 92.9%  85.7% |
| Sexo hombre:  1 punto | 92.9%  85.7% |
| Historia de tabaquismo (tanto fumador activo como exfumador)  Opciones de puntuación:  - De 0 a 9 paquetes/año, 1 punto. De 10 a 19 paquetes/año, 2 puntos. ≥20 paquetes/año, 3 puntos  - De 10 a 19 paquetes/año, 2 puntos. ≥20 paquetes/año, 3 puntos | 100%  28.6%  35.7% |
| Duración de la enfermedad mayor de 5 años:  1 punto | 64.3%  71.4% |
| Actividad de la enfermedad moderada-alta de forma persistente (DAS28-VSG promedio >3.2 desde el diagnóstico de la enfermedad en pacientes con AR de inicio o DAS28-VSG >3.2 durante un mínimo de 6 meses en pacientes con AR establecida):  1 punto | 85.7%  92.9% |
| Factor reumatoide más de 3 veces por encima del límite superior de la normalidad:  1 punto | 78.6%  85.7% |
| ACPA entre 1 y 3 veces por encima del límite superior de la normalidad:  2 puntos | 85.7%  78.6% |
| ACPA más de 3 veces por encima del límite superior de la normalidad:  3 puntos | 92.9%  78.6% |
| Se considerará susceptible de cribado si suma 4 o más puntos en el sistema de puntuación | 71.4% |
| ***¿Qué pruebas hacer?*** |  |
| Pacientes con clínica respiratoria (tos y/o disnea de más de 3 meses de evolución): pruebas de función respiratoria + DLCO y Rx de tórax. En función de su resultado, se valorará la realización de TAC torácico de alta resolución (TACAR)** | 71.4% |
| Pacientes sin patología pulmonar previa conocida en los que se detecten crepitantes tipo velcro en la auscultación pulmonar: directamente TACAR | 100% |
| Punto de corte en el sistema de puntuación para solicitar directamente TACAR: 6 puntos  Punto de corte en el sistema de puntuación para solicitar directamente TACAR: 7 puntos  Entre 4 puntos y el punto de corte decidido: pruebas de función respiratoria + DLCO y Rx de tórax. En función de su resultado, se valorará la realización de TACAR** | 64.3%  71.4%  71.4% |
| ** Si las listas de espera para la realización de pruebas de función respiratoria son muy grandes, valorar realizar directamente TACAR | 71.4% |
| ***Periodicidad del cribado*** |  |
| Se recomienda una vez al año auscultar a los pacientes, interrogarles específicamente acerca de la presencia de síntomas respiratorios y valorar los factores de riesgo de EPID (de acuerdo con la puntuación indicada) | 92.9% |
| Si se detectan crepitantes o aparecen síntomas respiratorios, se repetirán las pruebas de cribado de acuerdo con las recomendaciones previas, independientemente de que las pruebas de cribado en años previos hayan sido negativas | 100% |
| En los pacientes sin los síntomas respiratorios especificados en el punto 1 ni crepitantes tipo velcro, que hayan obtenido una puntuación total igual o superior a 4 y el cribado haya sido negativo, este se repetirá una vez al año realizando espirometría y DLCO | 85.7% |

1Para aquellos ítems compuestos por criterio y puntuación, se recoge por separado el grado de acuerdo para cada uno.

Se recogieron las siguientes propuestas para la inclusión de nuevos criterios:

- Antecedentes familiares de enfermedad pulmonar intersticial (variable dicotómica: sí/no)": 1 punto en caso de ser afirmativa.

- Saturación de oxígeno baja (< 90%): 1 punto.

- Biomarcadores, opcionales (MMP-7; MUC5b; KL-6, IL-18): 1 punto.

- Inicio tardío de AR (>65 años): 1 punto.

- Cambios de la saturación de O2 en 2 determinaciones separadas por 3-6 meses.

Tras la valoración por el comité científico de los criterios para los que no se alcanzó consenso y de los comentarios de los panelistas, se realizó la segunda ronda del Delphi para que los miembros del panel volviesen a valorar los siguientes aspectos:

- Edad ≥ 55 años: 1 punto. Las opciones a valorar fueron eliminar este rango de edad, mantenerlo o bajarlo a 50 años.

- Edad ≥ 60 años: 2 puntos. Aunque el grado de acuerdo fue superior al 75%, en vista de los comentarios de los panelistas en la primera ronda, se decidió que en la segunda valorasen las siguientes opciones: mantener la edad en 60 o subirla a 65; mantener la puntuación en 2 puntos o bajarla a 1 punto.

- Sexo masculino: 1 punto. Aunque el grado de acuerdo fue superior al 75%, en vista de los comentarios de los panelistas en la primera ronda, se decidió que en la segunda valorasen si mantener 1 punto o asignar 2 puntos cuando el paciente sea hombre.

- Historia de tabaquismo (tanto fumador activo como exfumador). En la primera ronda del Delphi no se alcanzó acuerdo en la forma de puntuarlo. En la segunda ronda se valoraron las siguientes opciones: a) de 0 a 9 paquetes/año, 1 punto; de 10 a 19 paquetes/año, 2 puntos; ≥20 paquetes/año, 3 puntos; b) De 10 a 19 paquetes/año, 2 puntos; ≥20 paquetes/año, 3 puntos; d) <20 paquetes/año, 2 puntos; ≥20 paquetes/año, 3 puntos; d) Valorar años fumados en lugar de paquetes/año (sería de 0 a 9 años, 1 punto; de 10 a 19, 2 puntos; y ≥20 años, 3 puntos).

- Duración de la enfermedad mayor de 5 años: 1 punto. Las opciones a valorar fueron mantener el criterio y su puntuación tal cual estaban definidos o no tener en cuenta este criterio.

- “Se considerará susceptible de cribado si suma 4 o más puntos en el sistema de puntuación.” Las opciones a valorar fueron mantener el punto de corte en ≥4 o poner el punto de corte en ≥5.

- En cuanto a la propuesta de criterios adicionales, se valoró el de antecedentes familiares de EPID, con asignación de 1 punto.

- “Pacientes con clínica respiratoria (tos y/o disnea de más de 3 meses de evolución): espirometría + DLCO y Rx de tórax. En función de su resultado, se valorará la realización de TAC torácico de alta resolución (TACAR)**” Las opciones a valorar fueron mantenerlo tal como estaba o hacer directamente TACAR.

- Pruebas a realizar en pacientes sin la clínica respiratoria especificada ni crepitantes tipo velcro. Las opciones a valorar fueron: a) Puntuación ≥6: solicitar directamente TACAR; b) Puntuación ≥7: solicitar directamente TACAR; c) Entre 4 ó 5 puntos (según lo decidido por la votación en el apartado previo correspondiente) y el punto de corte decidido: espirometría + DLCO y Rx de tórax. En función de su resultado, se valorará la realización de TACAR**; d) Puntuación ≥4 o 5 puntos (según lo decidido por la votación en el apartado previo correspondiente): solicitar directamente TACAR.

- “** Si las listas de espera para la realización de pruebas de función respiratoria son muy grandes, valorar realizar directamente TACAR.” Las opciones a valorar fueron mantenerlo tal como estaba o completarlo para que quedase de la siguiente forma: “Si las listas de espera para la realización de pruebas de función respiratoria son muy grandes, valorar alguna de las siguientes opciones: realizar directamente TACAR; realizar una prueba de esfuerzo respiratoria o un Walking Test 6 min (en esta prueba el descenso de la saturación entre el principio y el final de la prueba o la desaturación son datos que aparecen precozmente en la evolución del paciente); derivar al paciente a la consulta de Neumología o a la Unidad de EPID”.

**Resultados de la segunda ronda Delphi**

Se recogió la valoración de los 14 miembros del panel. La tabla 2 muestra el grado de acuerdo (porcentaje de panelistas que valoraron con puntuación 4 o 5) alcanzado para cada uno de los ítems valorados en la segunda ronda.

**Tabla 2. Criterios de cribado/detección precoz de EPID en pacientes con AR. Resultados de la segunda ronda del Delphi.**

|  | **Grado de acuerdo** |
| --- | --- |
| Edad ≥55 años: 1 punto  Eliminar este rango de edad  Mantenerlo  Bajarlo a 50 años | 50%  28.6%  35.7% |
| Edad ≥60 años: 2 puntos  Mantener el punto de corte en ≥ 60  Subir el punto de corte a 65  Mantener la asignación de 2 puntos  Bajar la asignación a 1 punto | 71.4%  42.9%  71.4%  50% |
| Sexo hombre: 1 punto  Mantener la asignación de 1 punto  Asignar 2 puntos cuando el paciente sea hombre | 57.1%  71.4% |
| Historia de tabaquismo (tanto fumador activo como exfumador)  de 0 a 9 paquetes/año, 1 punto; de 10 a 19 paquetes/año, 2 puntos; ≥20 paquetes/año, 3 puntos  De 10 a 19 paquetes/año, 2 puntos; ≥20 paquetes/año, 3 puntos  <20 paquetes/año, 2 puntos; ≥20 paquetes/año, 3 puntos  0 a 9 años, 1 punto; de 10 a 19, 2 puntos; y ≥20 años, 3 puntos | 42.9%  35.7%  35.7%  57.1% |
| Duración de la enfermedad mayor de 5 años: 1 punto  Mantener el criterio  No tener en cuenta este criterio | 78.6%  28.6% |
| Antecedentes familiares de EPID  1 punto | 64.3%  85.7% |
| Se considerará susceptible de cribado si suma 4 o más puntos en el sistema de puntuación  Mantener el punto de corte en ≥4  Poner el punto de corte en ≥5 | 57.1%  78.6% |
| “Pacientes con clínica respiratoria (tos y/o disnea de más de 3 meses de evolución): espirometría + DLCO y Rx de tórax. En función de su resultado, se valorará la realización de TAC torácico de alta resolución (TACAR)**”  Mantenerlo tal como está  Hacer directamente TACAR | 71.4%  42.9% |
| Pruebas a realizar en pacientes sin la clínica respiratoria especificada ni crepitantes tipo velcro  Puntuación ≥6: solicitar directamente TACAR  Puntuación ≥7: solicitar directamente TACAR  Entre 4 o 5 puntos y el punto de corte decidido: espirometría + DLCO y Rx de tórax. En función de su resultado, se valorará la realización de TACAR**  Puntuación ≥4 o 5 puntos: solicitar directamente TACAR | 71.4%  85.7%  78.6%  28.6% |
| “** Si las listas de espera para la realización de pruebas de función respiratoria son muy grandes, valorar realizar directamente TACAR.”  Mantenerlo tal como está  Opción más completa | 57.1%  71.4% |

Dados estos resultados, se decidió realizar una tercer ronda Delphi para valorar aquellos puntos para los que no se había alcanzado consenso. Se pidió a los miembros del panel que a la hora de valorar las diferentes alternativas dentro de un mismo punto evitasen en lo posible asignarles la misma puntuación. También se les pidió que tratasen de evitar usar la puntuación 3, salvo que lo considerasen inevitable.

**Resultados de la tercera ronda del Delphi**

Se recogió la valoración de los 14 miembros del panel. La tabla 3 muestra el grado de acuerdo (porcentaje de panelistas que valoraron con puntuación 4 o 5) alcanzado para cada uno de los ítems valorados en la tercera ronda. Para aquellos ítems en los que el grado de acuerdo fue menor del 75%, se recoge también el grado de desacuerdo (porcentaje de panelistas que valoraron con puntuación 1 o 2).

**Tabla 3. Criterios de cribado/detección precoz de EPID en pacientes con AR. Resultados de la tercera ronda del Delphi.**

|  | **Grado de acuerdo** | **Grado de desacuerdo** |
| --- | --- | --- |
| Edad ≥55 años: 1 punto  Eliminar este rango de edad  Mantenerlo  Bajarlo a 50 años | 57.1%  42.9% | 42.9%  57.1%  85.7% |
| Edad ≥60 años: 2 puntos  Mantener el punto de corte en ≥ 60  Subir el punto de corte a 65  Mantener la asignación de 2 puntos  Bajar la asignación a 1 punto | 85.7%  28.6%  57.1%  50% | 71.4%  42.9%  50% |
| Sexo hombre: 1 punto  Mantener la asignación de 1 punto  Asignar 2 puntos cuando el paciente sea hombre | 71.4%  50% | 28.6%  50% |
| Historia de tabaquismo (fumador activo y exfumador)  de 0 a 9 paquetes/año, 1 punto; de 10 a 19 paquetes/año, 2 puntos; ≥20 paquetes/año, 3 puntos  De 10 a 19 paquetes/año, 2 puntos; ≥20 paquetes/año, 3 puntos  <20 paquetes/año, 2 puntos; ≥20 paquetes/año, 3 puntos  0 a 9 años, 1 punto; de 10 a 19, 2 puntos; y ≥20 años, 3 puntos | 50%  28.6%  71.4%  57.1% | 42.9%  71.4%  14.3%  42.9% |
| Antecedentes familiares de EPID | 92.9% |  |
| “Pacientes con clínica respiratoria (tos y/o disnea de más de 3 meses de evolución): espirometría + DLCO y Rx de tórax. En función de su resultado, se valorará la realización de TAC torácico de alta resolución (TACAR)**”  Mantenerlo tal como está  Hacer directamente TACAR | 71.4%  42.9% | 14.3%  57.1% |
| “** Si las listas de espera para la realización de pruebas de función respiratoria son muy grandes, valorar realizar directamente TACAR.”  Mantenerlo tal como está  Opción más completa | 71.4%  57.1% | 28.6%  28.6% |

**Cribado/detección precoz de AR en pacientes diagnosticados de EPID de causa no filiada**

**Resultados de la primera ronda del Delphi**

Se recogió la valoración de los 14 miembros del panel. La tabla 4 muestra el grado de acuerdo (porcentaje de panelistas que valoraron con puntuación 4 o 5) alcanzado para cada ítem propuesto por el Comité Científico.

**Tabla 4. Criterios de cribado/detección precoz de AR en pacientes con EPID. Resultados de la primera ronda del Delphi.**

|  | **Grado de acuerdo** |
| --- | --- |
| ACPA positivo | 100% |
| Factor reumatoide positivo a cualquier título en menores de 65 años | 57,1% |
| Factor reumatoide en pacientes ≥65 años  Opciones:  Títulos ≥2 por encima del LSN  Títulos ≥3 por encima del LSN | 57,1%  71,4% |
| Dolor de articulaciones metacarpofalángicas o metatarsofalángicas, objetivable mediante el test de compresión lateral de metacarpofalángicas o metatarsofalángicas | 85,7% |
| Rigidez articular matutina de más de 30 minutos de duración | 92,9% |
| Tumefacción articular  Opciones:  Tumefacción en 2 o más articulaciones  Tumefacción en 3 o más articulaciones | 78,6%  64,3% |
| Período de 4 semanas o más de duración de los síntomas | 92,9% |
| *Periodicidad del cribado* |  |
| Valoración de la clínica articular cada 6 meses | 92,9% |
| Serología cada 12 meses durante los 3 primeros años desde el diagnóstico. Posteriormente, a criterio médico según la evolución del paciente | 78,6% |

*LSN: límite superior de normalidad*

Se recogieron las siguientes propuestas de inclusión de nuevos criterios:

“Se podría valorar la inclusión del antecedente familiar de artritis reumatoide, nunca como criterio único de derivación, pero sí complementando a alguno de los otros”

“Marcadores inflamatorios PCR, VSG. Quizás poco específicos, pero pueden ser útiles en conjunto a otros apartados exploratorios o AI (como por ejemplo en el punto anterior donde sólo tenemos 2 articulaciones tumefactas)”

“*añadir ecografía articular”*

*“*Si incluimos estos criterios deberíamos añadir bilateralidad y simetría de la artritis como un factor discriminatorio”

Tras la valoración por el comité científico de los criterios para los que no se alcanzó consenso y de los comentarios de los panelistas, se realizó la segunda ronda del Delphi, para que los miembros del panel volviesen a valorar los siguientes puntos:

- Factor reumatoide en menores de 65 años: positivo a cualquier título. Las opciones a valorar fueron: en cuanto al punto de corte de la edad, mantenerlo en 65 o bajarlo a 60; en cuanto al título de factor reumatoide, mantener positivo a cualquier título o considerar títulos ≥ 2 por encima del límite superior de normalidad.

- Factor reumatoide en pacientes ≥65 años: los panelistas tuvieron que valorar las mismas opciones que en la primera ronda (títulos ≥ 2 por encima del LSN o títulos ≥ 3 por encima del LSN).

Por otro lado, en los puntos relativos a la periodicidad del cribado, a raíz de los comentarios de los panelistas se hicieron pequeñas modificaciones, que no fueron sometidas a nueva valoración en la segunda ronda. No obstante, todos los panelistas fueron informados de dichas modificaciones.

El comité científico no consideró oportuna la inclusión de los criterios adicionales propuestos, por lo que no fueron valorados en la segunda ronda.

**Resultados de la segunda ronda del Delphi**

Se recogió la valoración de los 14 miembros del panel. La tabla 5 muestra el grado de acuerdo (porcentaje de panelistas que valoraron con puntuación 4 o 5) alcanzado para cada uno de los ítems valorados en la segunda ronda. Para aquellos ítems en los que el grado de acuerdo fue menor del 75%, se recoge también el grado de desacuerdo (porcentaje de panelistas que valoraron con puntuación 1 o 2).

**Tabla 5. Criterios de cribado/detección precoz de AR en pacientes con EPID. Resultados de la segunda ronda del Delphi.**

|  | **Grado de acuerdo** | **Grado de desacuerdo** |
| --- | --- | --- |
| Factor reumatoide en menores de 65 años  Opciones:  Mantener el punto de corte de la edad en 65  Bajarlo a 60  Mantener positivo a cualquier título  Considerar títulos ≥ 2 por encima del LSN | 64,3%  71,4%  14,3%  100% | 21,4%  28,6%  78,6% |
| Factor reumatoide en pacientes ≥65 años  Opciones:  Títulos ≥2 por encima del LSN  Títulos ≥3 por encima del LSN | 92,9%  35,7% | 42,9% |
